# Supplementary material
Source: publisher figshare collection journal article supplement (https://acs.figshare.com/ndownloader/files/17972396)
Supplement: Supplementary file 1 [file 17972396]

# Improved CO Oxidation via Surface Stabilization of Ceria Nanoparticles Induced by Rare-Earth Metal Dopants

Kyung-Jong Noh,<sup>†</sup> Kyeounghak Kim,<sup>†</sup> Hyung Jun Kim,<sup>†</sup> Dongjae Shin,  
and Jeong Woo Han<sup>\*</sup>

*Department of Chemical Engineering, Pohang University of Science and Technology  
(POSTECH), Pohang, Gyeongbuk 37673, Republic of Korea*

## Supporting Information

### Experimental information

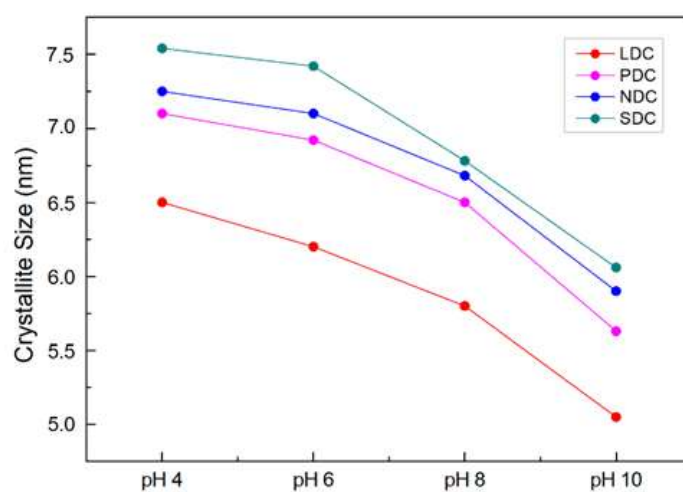

**Figure S1:** Crystallite size of  $\text{Ce}_{0.8}\text{RE}_{0.2}\text{O}_2$  as a function of solution pH (calcined at 500 °C for 3 hours).

Correspondence to [jwhan@postech.ac.kr](mailto:jwhan@postech.ac.kr)

<sup>†</sup>K.-J. Noh, K. Kim, and H. J. Kim contributed equally to this work.

|     | $\text{Ce}_{0.9}\text{RE}_{0.1}\text{O}_2$ (RE = 10%) |          | $\text{Ce}_{0.8}\text{RE}_{0.2}\text{O}_2$ (RE = 20%) |          |
|-----|-------------------------------------------------------|----------|-------------------------------------------------------|----------|
|     | Ce (wt%)                                              | RE (wt%) | Ce (wt%)                                              | RE (wt%) |
| LDC | 90.44                                                 | 9.56     | 80.67                                                 | 19.33    |
| PDC | 90.67                                                 | 9.33     | 81.33                                                 | 18.67    |
| NDC | 91.39                                                 | 8.61     | 81.16                                                 | 18.84    |
| SDC | 91.33                                                 | 8.67     | 80.92                                                 | 19.08    |

**Table S1:** SEM-Energy Dispersive Spectroscopy (EDS) of well-synthesized composites at the same condition (S-REC); (a)  $\text{Ce}_{0.9}\text{RE}_{0.1}\text{O}_2$  and (b)  $\text{Ce}_{0.8}\text{RE}_{0.2}\text{O}_2$  nanoparticles.

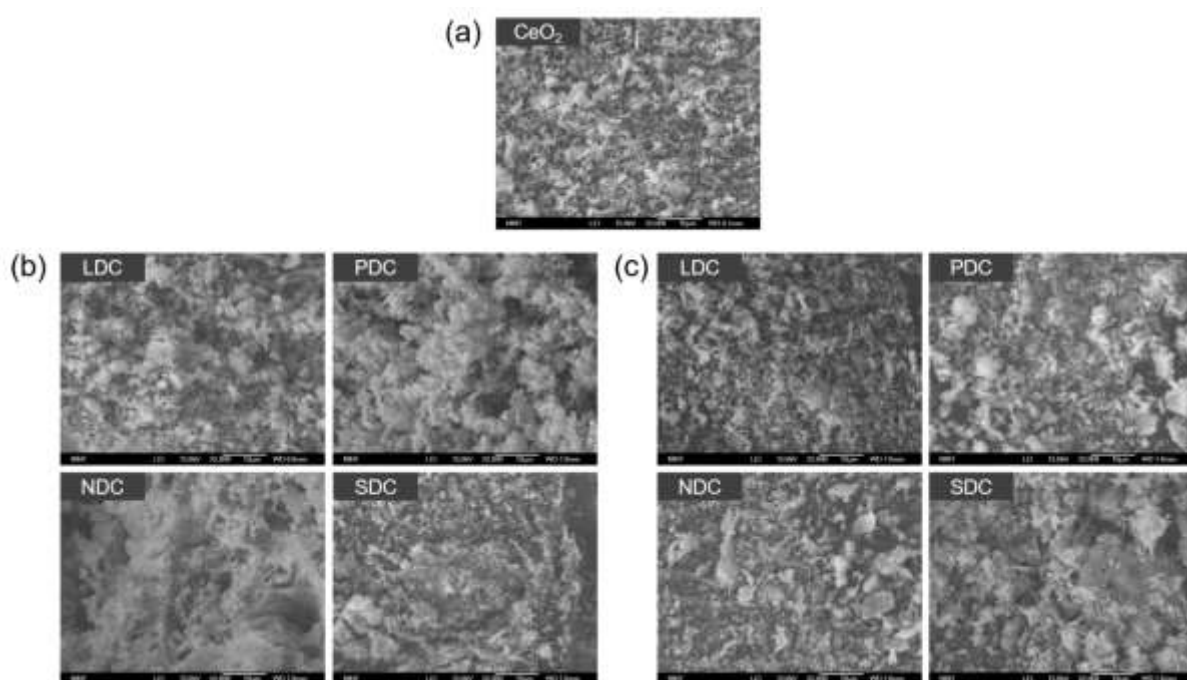

**Figure S2:** SEM images of well-synthesized composites at the same condition (S-REC); (a) pure  $\text{CeO}_2$ , (b)  $\text{Ce}_{0.9}\text{RE}_{0.1}\text{O}_2$  (RE = 10%), and (c)  $\text{Ce}_{0.8}\text{RE}_{0.2}\text{O}_2$  (RE = 20%) nanoparticles.

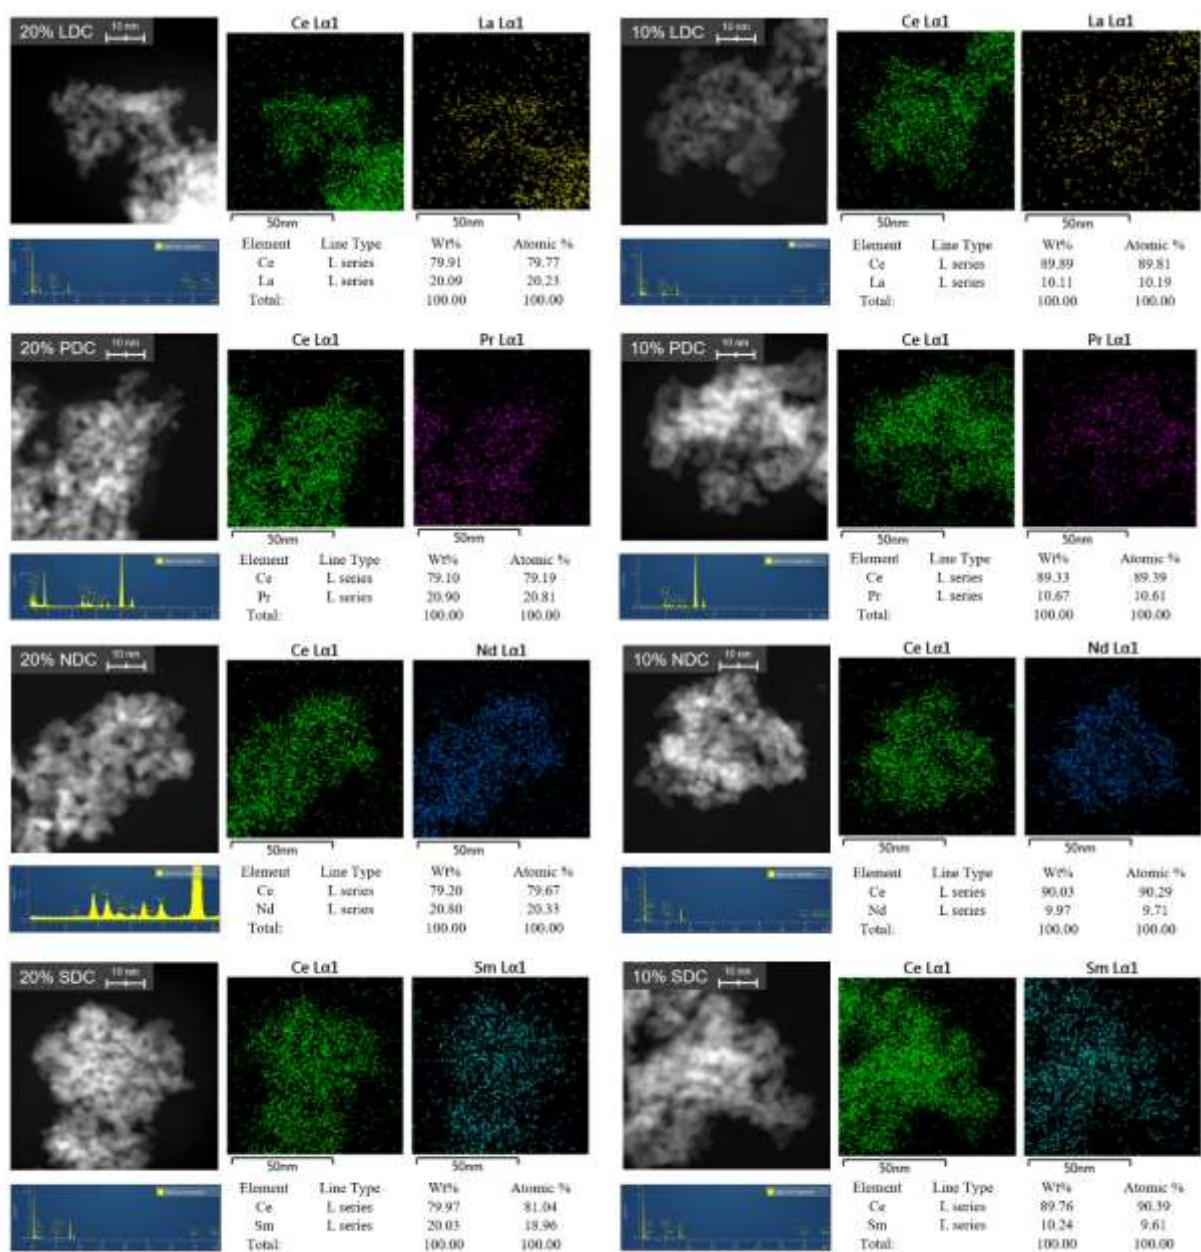

**Figure S3:** TEM-EDS mapping and distribution analysis of well-synthesized composites at the same condition (S-REC);  $\text{Ce}_{0.9}\text{RE}_{0.1}\text{O}_2$  (RE = 10%) and  $\text{Ce}_{0.8}\text{RE}_{0.2}\text{O}_2$  (RE = 20%) nanoparticles.

| Sample  | Ce                  | RE                  |
|---------|---------------------|---------------------|
| 20% LDC | Ce <sub>0.799</sub> | La <sub>0.201</sub> |
| 10% LDC | Ce <sub>0.899</sub> | La <sub>0.101</sub> |
| 20% PDC | Ce <sub>0.801</sub> | Pr <sub>0.199</sub> |
| 10% PDC | Ce <sub>0.898</sub> | Pr <sub>0.102</sub> |
| 20% NDC | Ce <sub>0.802</sub> | Nd <sub>0.198</sub> |
| 10% NDC | Ce <sub>0.901</sub> | Nd <sub>0.099</sub> |
| 20% SDC | Ce <sub>0.797</sub> | Sm <sub>0.203</sub> |
| 10% SDC | Ce <sub>0.898</sub> | Sm <sub>0.102</sub> |

**Table S2:** ICP-AES analysis of well-synthesized composites at the same condition (S-REC); Ce<sub>0.9</sub>RE<sub>0.1</sub>O<sub>2</sub> and Ce<sub>0.8</sub>RE<sub>0.2</sub>O<sub>2</sub> nanoparticles. The samples were analyzed three times and averaged.

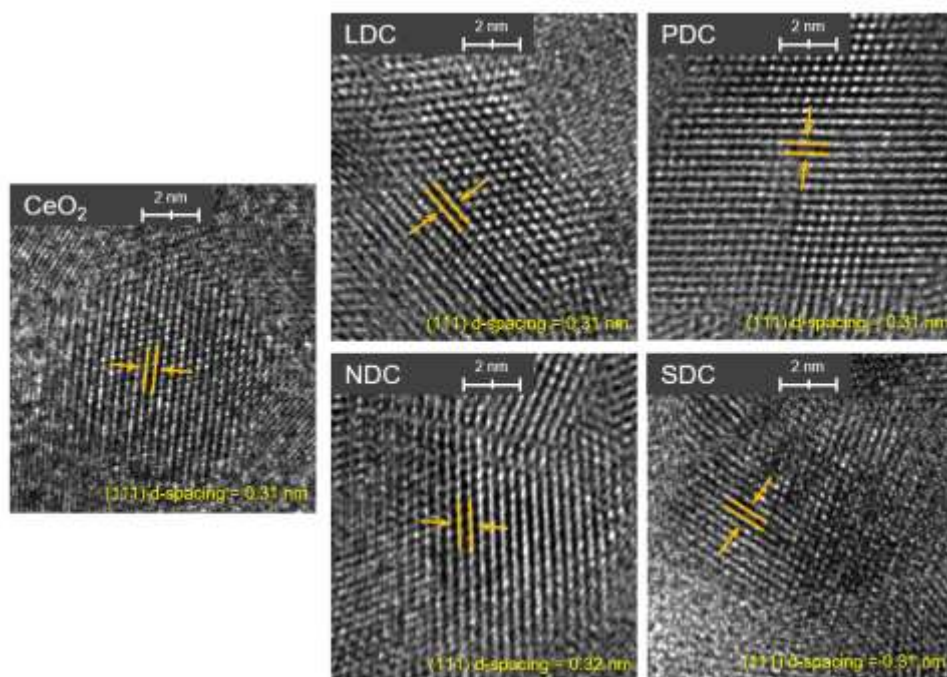

**Figure S4:** HRTEM images of well-synthesized composites at the same condition (S-REC); pure CeO<sub>2</sub> and Ce<sub>0.8</sub>RE<sub>0.2</sub>O<sub>2</sub> (RE = 20%) nanoparticles.

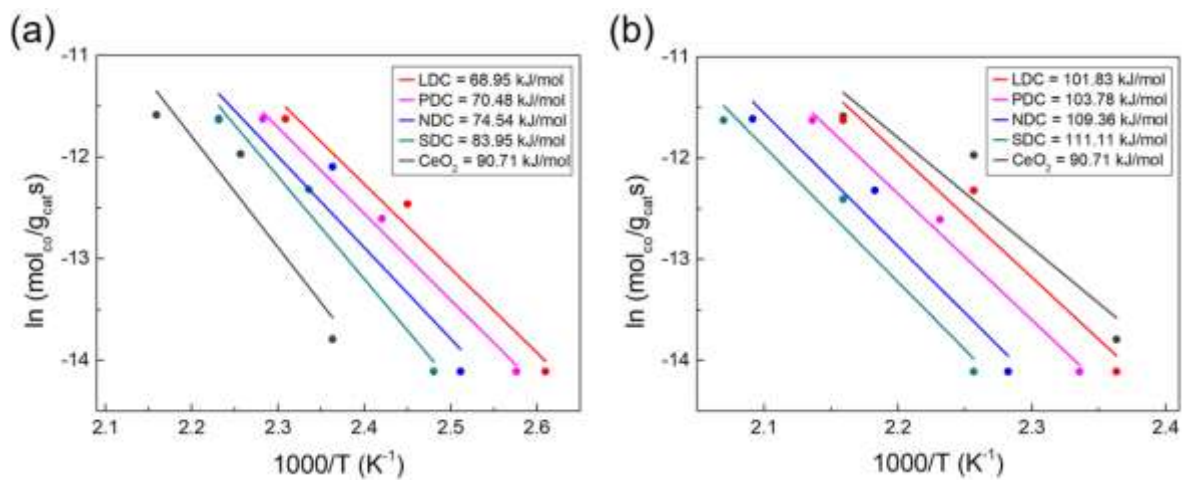

**Figure S5:** Arrhenius plots for CO oxidation of  $\text{Ce}_{0.8}\text{RE}_{0.2}\text{O}_2$  (RE = 20%) composites; (a) S-REC nanoparticles and (b) C-REC nanoparticles.

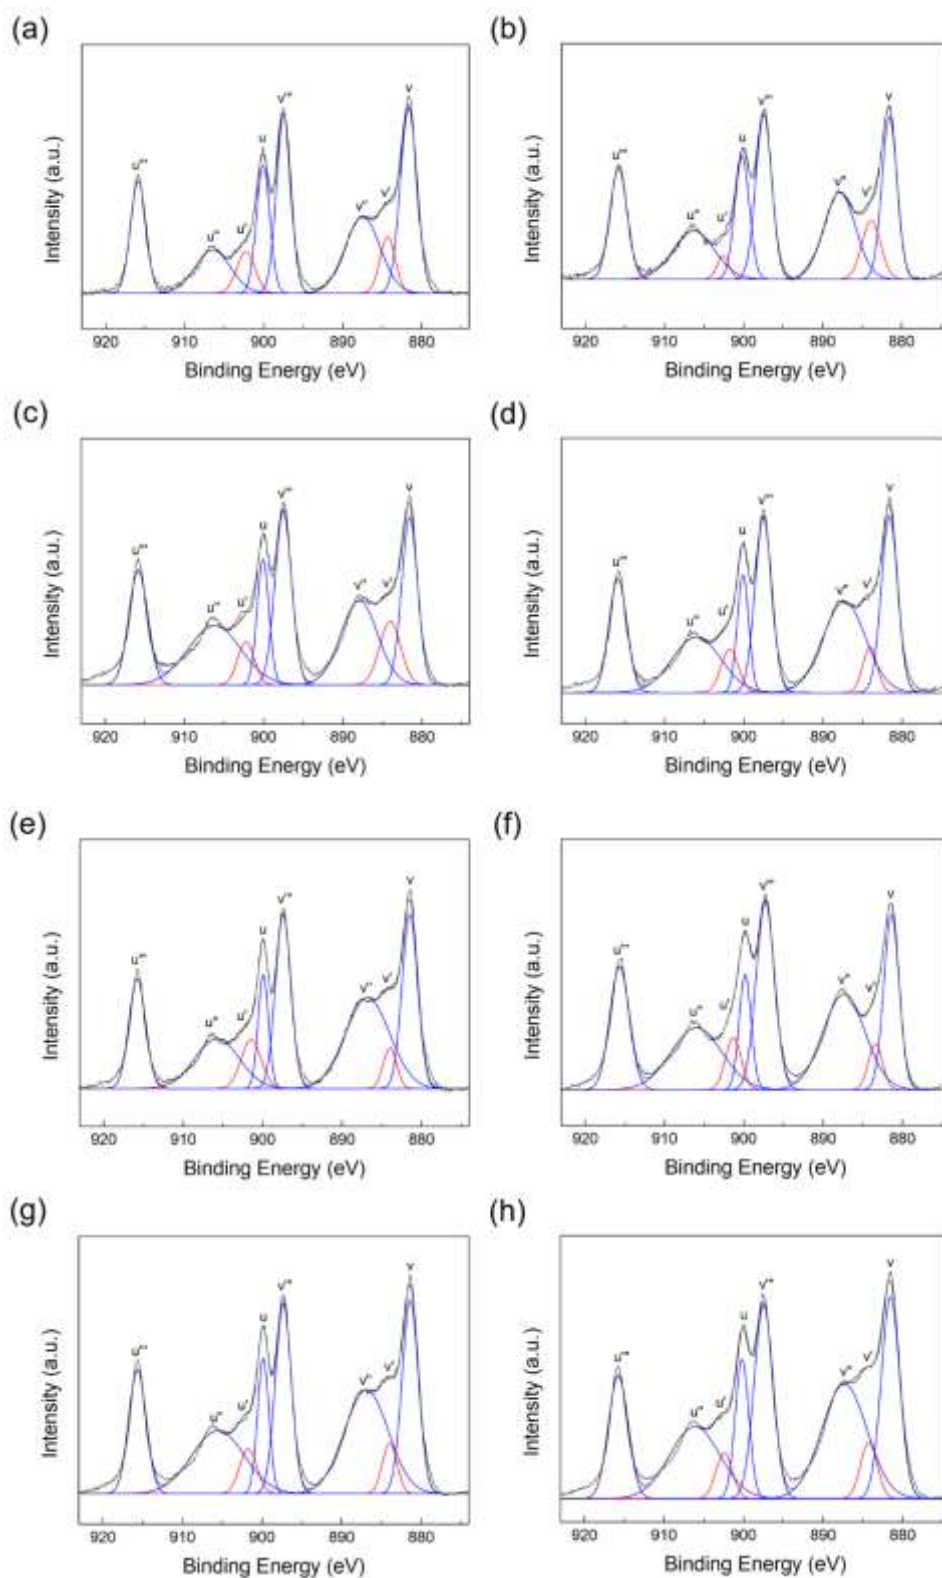

**Figure S6:** XPS spectra of (a) ~ (d) 20% S-REC nanoparticles; (a) LDC, (b) PDC, (c) NDC, (d) SDC and (e) ~ (h) 20% C-REC nanoparticles; (e) LDC, (f) PDC, (g) NDC, (h) SDC nanoparticles. The peaks of ( $v'''$ ), ( $v''$ ), ( $v$ ), ( $u'''$ ), ( $u''$ ), and ( $u$ ) were assigned to  $Ce^{4+}$  species while the peaks of ( $v'$ ) and ( $u'$ ) were assigned to  $Ce^{3+}$  species.



## Computational information

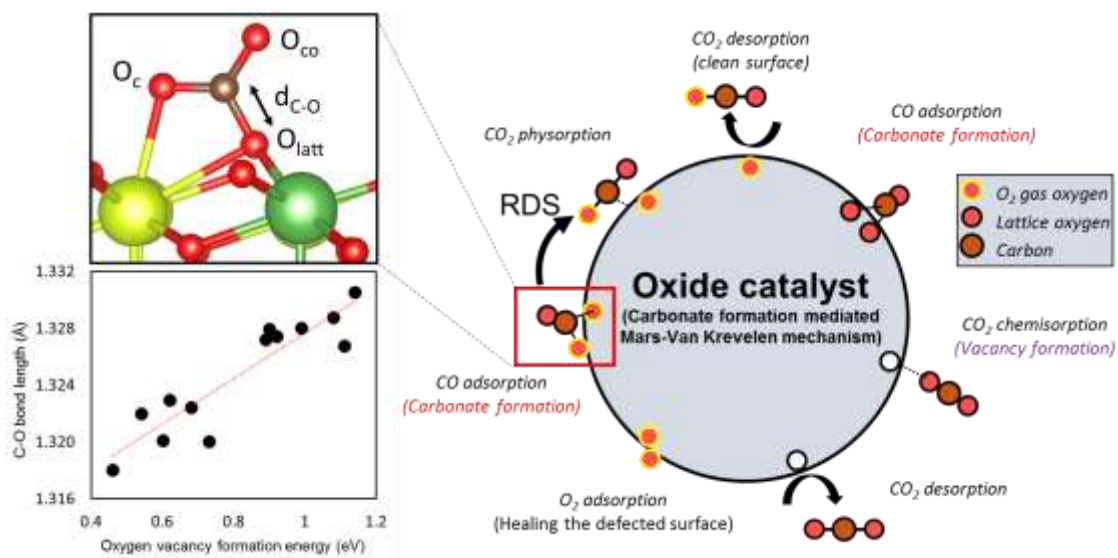

**Figure S7:** Relationship of bond length between C atom in carbonate species and lattice oxygen (O<sub>latt</sub>) with oxygen vacancy formation energy of rare earth metal doped CeO<sub>2</sub>(111) at rate-determining step of CO oxidation *via* Mars-van Krevelen (MvK) mechanism. Left side of figures are reprinted from Kim et al. with permission.<sup>1</sup> Copyright 2017, Elsevier. Right side of a figure is reprinted from Kim et al. with permission.<sup>2</sup> Copyright 2017, American Chemical Society.

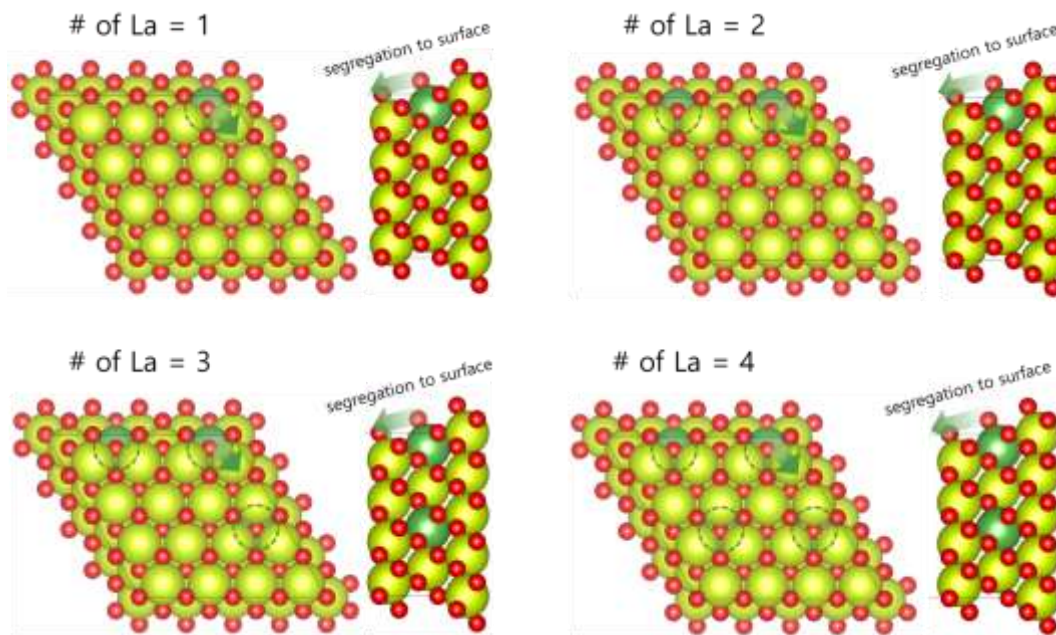

**Figure S8.** Atomic configurations of La-doped  $\text{CeO}_2(111)$  (LDC) slab models as a function of the number of La dopants, which were employed to calculate the segregation energies ( $E_{\text{seg}}$ ) of LDCs at different concentrations.

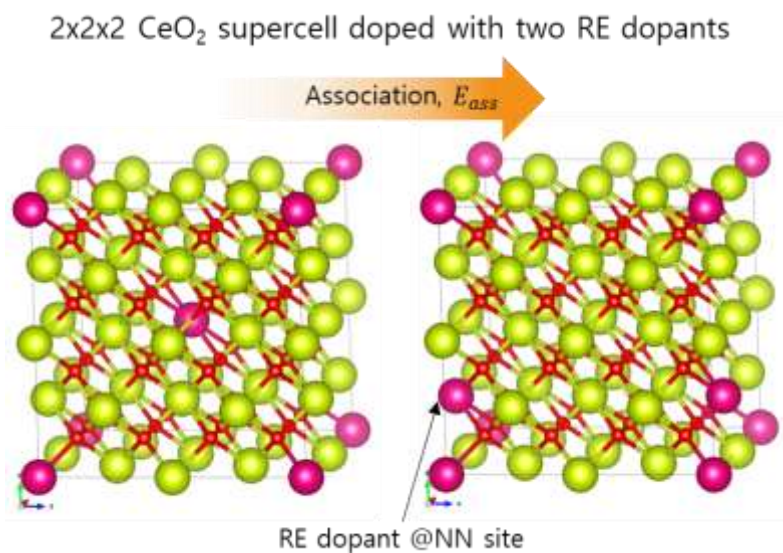

**Figure S9.** Atomic configurations of RE-doped  $\text{CeO}_2$  (REC) bulk models which were employed to calculate the association energies ( $E_{\text{ass}}$ ) of RECs (RE = La, Pr, Nd, Sm).



## References

- (1) Kim, K.; Yoo, J. D.; Lee, S.; Bae, M.; Bae, J.; Jung, W.; Han, J. W. *ACS Appl. Mater. Inter.* **2017**, 9 (18), 15449-15458.
- (2) Kim, K.; Han, J. W. *Catal. Today* **2017**, 293-294, 82-88.
